# Supplementary material for: Carbon nanocoils decorated with scale-like mesoporous NiO nanosheets for ultrasensitive room temperature ppb-level NO2 sensing
Source: Royal Society of Chemistry journal article supplement (doi:10.1039/d2cp04860d), 2023-01-01
Supplement: d2cp04860d1.pdf [file d2cp04860d1.pdf]

## Supporting Information

Carbon Nanocoils Decorated with Scale-Like Mesoporous NiO

Nanosheets for Ultrasensitive Room Temperature Ppb-Level

NO<sub>2</sub> Sensing.

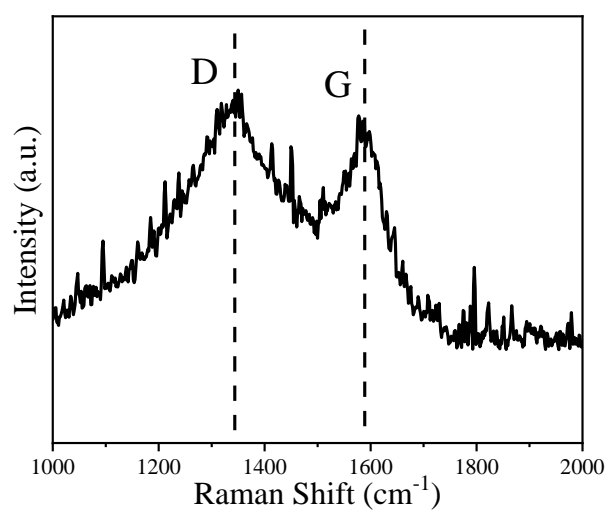

**Fig. S1.** Raman spectra of bare CNCs.

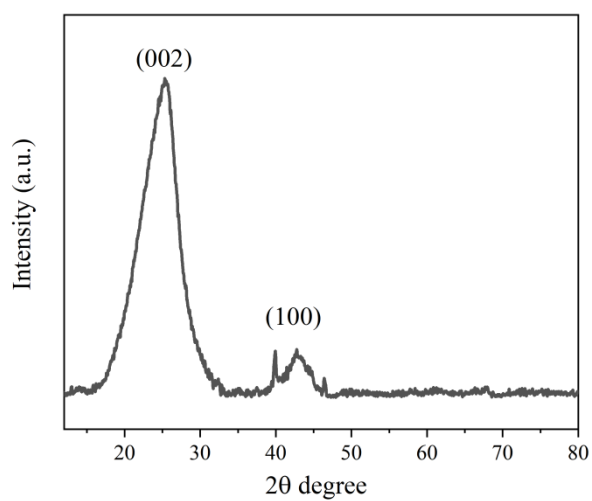

**Fig. S2.** XRD pattern of bare CNCs.

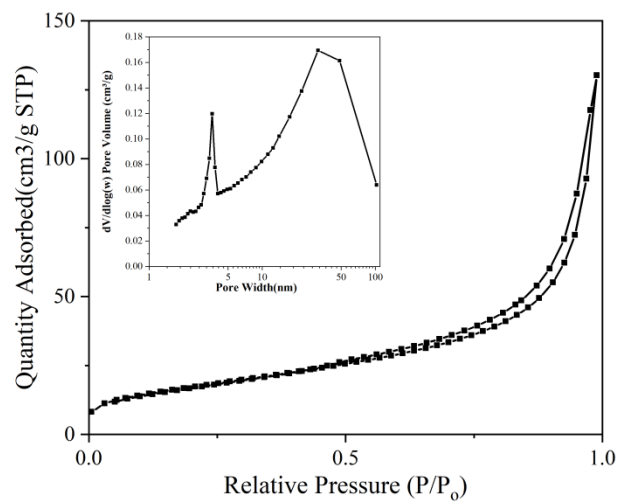

**Fig. S3.** Nitrogen adsorption and desorption isotherms and pore size distribution (the inset) of bare CNCs.

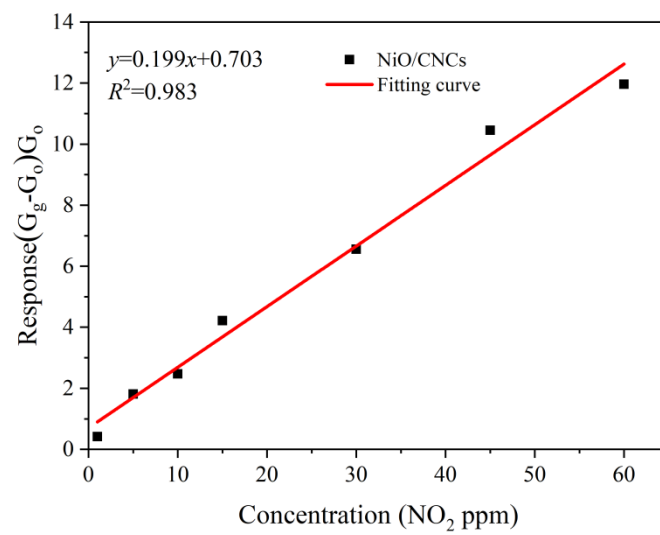

**Fig. S4.** Fitting curve of 2.0-NiO/CNCs obtained from Fig. 5b.
